# Supplementary material for: How Do Older Patients With Advanced Kidney Disease, and Their Family Members, Understand Kidney Function and Failure? A Qualitative Study
Source: Research Square preprint supplement (doi:10.21203/rs.3.rs-7325432/v1), 2025-09-04
Supplement: Supplementary file 1 [file 06dea376094f69d30e6e2c45.pdf]

## COREQ (COnsolidated criteria for REporting Qualitative research) Checklist:

### 32-item checklist

A checklist of items that should be included in reports of qualitative research. You must report the page number in your manuscript where you consider each of the items listed in this checklist. If you have not included this information, either revise your manuscript accordingly before submitting or note N/A.

| Topic                                          | Item No. | Guide questions/description                                                                                                                              | Reported on Page No.                                         |
|------------------------------------------------|----------|----------------------------------------------------------------------------------------------------------------------------------------------------------|--------------------------------------------------------------|
| <b>Domain 1: Research team and reflexivity</b> |          |                                                                                                                                                          |                                                              |
| <i>Personal Characteristics</i>                |          |                                                                                                                                                          |                                                              |
| Interviewer/facilitator                        | 1        | Which author/s conducted the interview or focus group?                                                                                                   | Page 7<br>(Methods; Data Collection)                         |
| Credentials                                    | 2        | What were the researcher's credentials? E.g. PhD, MD                                                                                                     | Page 7<br>(Methods; Data Collection)                         |
| Occupation                                     | 3        | What was their occupation at the time of the study?                                                                                                      | Page 7<br>(Methods; Data Collection)                         |
| Gender                                         | 4        | Was the researcher male or female?                                                                                                                       | Page 7<br>(Methods; Data Collection)                         |
| Experience and training                        | 5        | What experience or training did the researcher have?                                                                                                     | Page 7<br>(Methods; Data Collection)                         |
| <i>Relationship with participants</i>          |          |                                                                                                                                                          |                                                              |
| Relationship established                       | 6        | Was a relationship established prior to study commencement?                                                                                              | Page 6<br>(Methods; Sampling and Recruitment)                |
| Participant knowledge of the interviewer       | 7        | What did the participants know about the researcher? e.g. personal goals, reasons for doing the research                                                 | Page 7<br>(Methods; Data Collection)                         |
| Interviewer characteristics                    | 8        | What characteristics were reported about the interviewer/facilitator? e.g. Bias, assumptions, reasons and interests in the research topic                | Page 7<br>(Methods; Data Collection)                         |
| <b>Domain 2: Study design</b>                  |          |                                                                                                                                                          |                                                              |
| <i>Theoretical framework</i>                   |          |                                                                                                                                                          |                                                              |
| Methodological orientation and Theory          | 9        | What methodological orientation was stated to underpin the study? e.g. grounded theory, discourse analysis, ethnography, phenomenology, content analysis | Page 8<br>(Methods; Methodological and theoretical approach) |
| <i>Participant selection</i>                   |          |                                                                                                                                                          |                                                              |
| Sampling                                       | 10       | How were participants selected? e.g. purposive, convenience, consecutive, snowball                                                                       | Page 6<br>(Methods; Sampling and Recruitment)                |
| Method of approach                             | 11       | How were participants approached? e.g. face-to-face, telephone, mail, email                                                                              | Page 6<br>(Methods; Sampling and Recruitment)                |
| Sample size                                    | 12       | How many participants were in the study?                                                                                                                 | Page 9 (Results), Page 29 (Table 1) &                        |

|                                        |    |                                                                                                                                 |                                                                                   |
|----------------------------------------|----|---------------------------------------------------------------------------------------------------------------------------------|-----------------------------------------------------------------------------------|
|                                        |    |                                                                                                                                 | Supplementary file S4, Study Flow.                                                |
| Non-participation                      | 13 | How many people refused to participate or dropped out? Reasons?                                                                 | Supplementary file S4, Study Flow.                                                |
| <i>Setting</i>                         |    |                                                                                                                                 |                                                                                   |
| Setting of data collection             | 14 | Where was the data collected? e.g. home, clinic, workplace                                                                      | Page 7 (Methods; Data Collection)                                                 |
| Presence of non-participants           | 15 | Was anyone else present besides the participants and researchers?                                                               | Page 7 (Methods; Data Collection)                                                 |
| Description of sample                  | 16 | What are the important characteristics of the sample? e.g. demographic data, date                                               | Page 9 (Results) & Page 29 (Table 1)                                              |
| <i>Data collection</i>                 |    |                                                                                                                                 |                                                                                   |
| Interview guide                        | 17 | Were questions, prompts, guides provided by the authors? Was it pilot tested?                                                   | Page 7 (Methods; Data Collection) & Supplementary file S2, Interview topic guide. |
| Repeat interviews                      | 18 | Were repeat interviews carried out? If yes, how many?                                                                           | No repeat interviews were carried out.                                            |
| Audio/visual recording                 | 19 | Did the research use audio or visual recording to collect the data?                                                             | Page 7 (Methods; Data Collection)                                                 |
| Field notes                            | 20 | Were field notes made during and/or after the interview or focus group?                                                         | Page 7 (Methods; Data Collection)                                                 |
| Duration                               | 21 | What was the duration of the interviews or focus group?                                                                         | Page 10 (Results)                                                                 |
| Data saturation                        | 22 | Was data saturation discussed?                                                                                                  | Page 8 (Methods; Analysis)                                                        |
| Transcripts returned                   | 23 | Were transcripts returned to participants for comment and/or correction?                                                        | Transcripts were not returned to participants for comment or correction.          |
| <b>Domain 3: Analysis and findings</b> |    |                                                                                                                                 |                                                                                   |
| <i>Data analysis</i>                   |    |                                                                                                                                 |                                                                                   |
| Number of data coders                  | 24 | How many data coders coded the data?                                                                                            | Page 8 - 9 (Methods; Analysis; Rigour & Reflexivity)                              |
| Description of the coding tree         | 25 | Did authors provide a description of the coding tree?                                                                           | Page 8 (Methods; Analysis)                                                        |
| Derivation of themes                   | 26 | Were themes identified in advance or derived from the data?                                                                     | Page 8 (Methods; Analysis)                                                        |
| Software                               | 27 | What software, if applicable, was used to manage the data?                                                                      | Page 7 (Methods; Data Collection)                                                 |
| Participant checking                   | 28 | Did participants provide feedback on the findings?                                                                              | No they did not, however a PPI member is part of the authorship team.             |
| <i>Reporting</i>                       |    |                                                                                                                                 |                                                                                   |
| Quotations presented                   | 29 | Were participant quotations presented to illustrate the themes/findings? Was each quotation identified? e.g. participant number | Pages 10-16 (Results) and Pages 30-33 (Table 2)                                   |

|                              |    |                                                                        |                                                                                        |
|------------------------------|----|------------------------------------------------------------------------|----------------------------------------------------------------------------------------|
| Data and findings consistent | 30 | Was there consistency between the data presented and the findings?     | Pages 10-16 (Results) and Pages 30-33 (Table 2)                                        |
| Clarity of major themes      | 31 | Were major themes clearly presented in the findings?                   | Pages 10-16 (Results), Pages 16-21 (Discussion) & Supplementary File S3 (Thematic map) |
| Clarity of minor themes      | 32 | Is there a description of diverse cases or discussion of minor themes? | Pages 10-16 (Results), Pages 16-21 (Discussion) & Supplementary File S3 (Thematic map) |
