# Supplementary material for: How Do Older Patients With Advanced Kidney Disease, and Their Family Members, Understand Kidney Function and Failure? A Qualitative Study
Source: Research Square preprint supplement (doi:10.21203/rs.3.rs-7325432/v1), 2025-09-04

**Supplementary File S4.** Study flow diagram

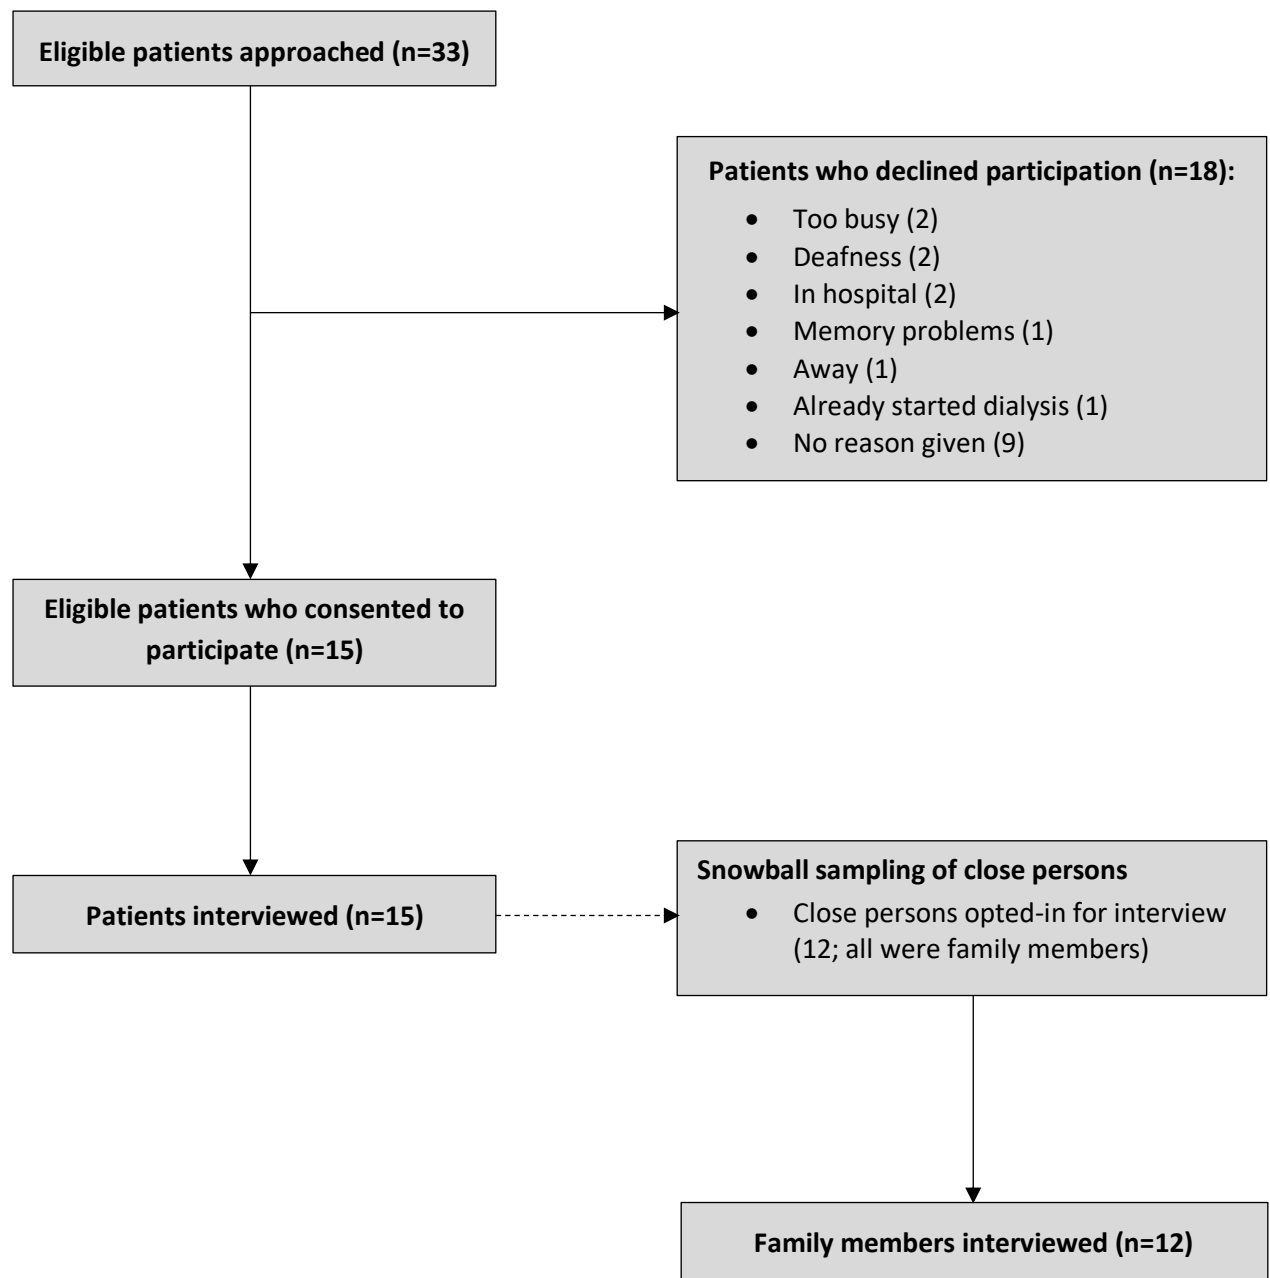

Supplement: Supplementary file [file 72acaf8c4d741b803422d895.pdf]
