# Supplementary material for: How Do Older Patients With Advanced Kidney Disease, and Their Family Members, Understand Kidney Function and Failure? A Qualitative Study
Source: Research Square preprint supplement (doi:10.21203/rs.3.rs-7325432/v1), 2025-09-04
Supplement: Supplementary file [file 734b09ce3c6e731e982073d7.pdf]

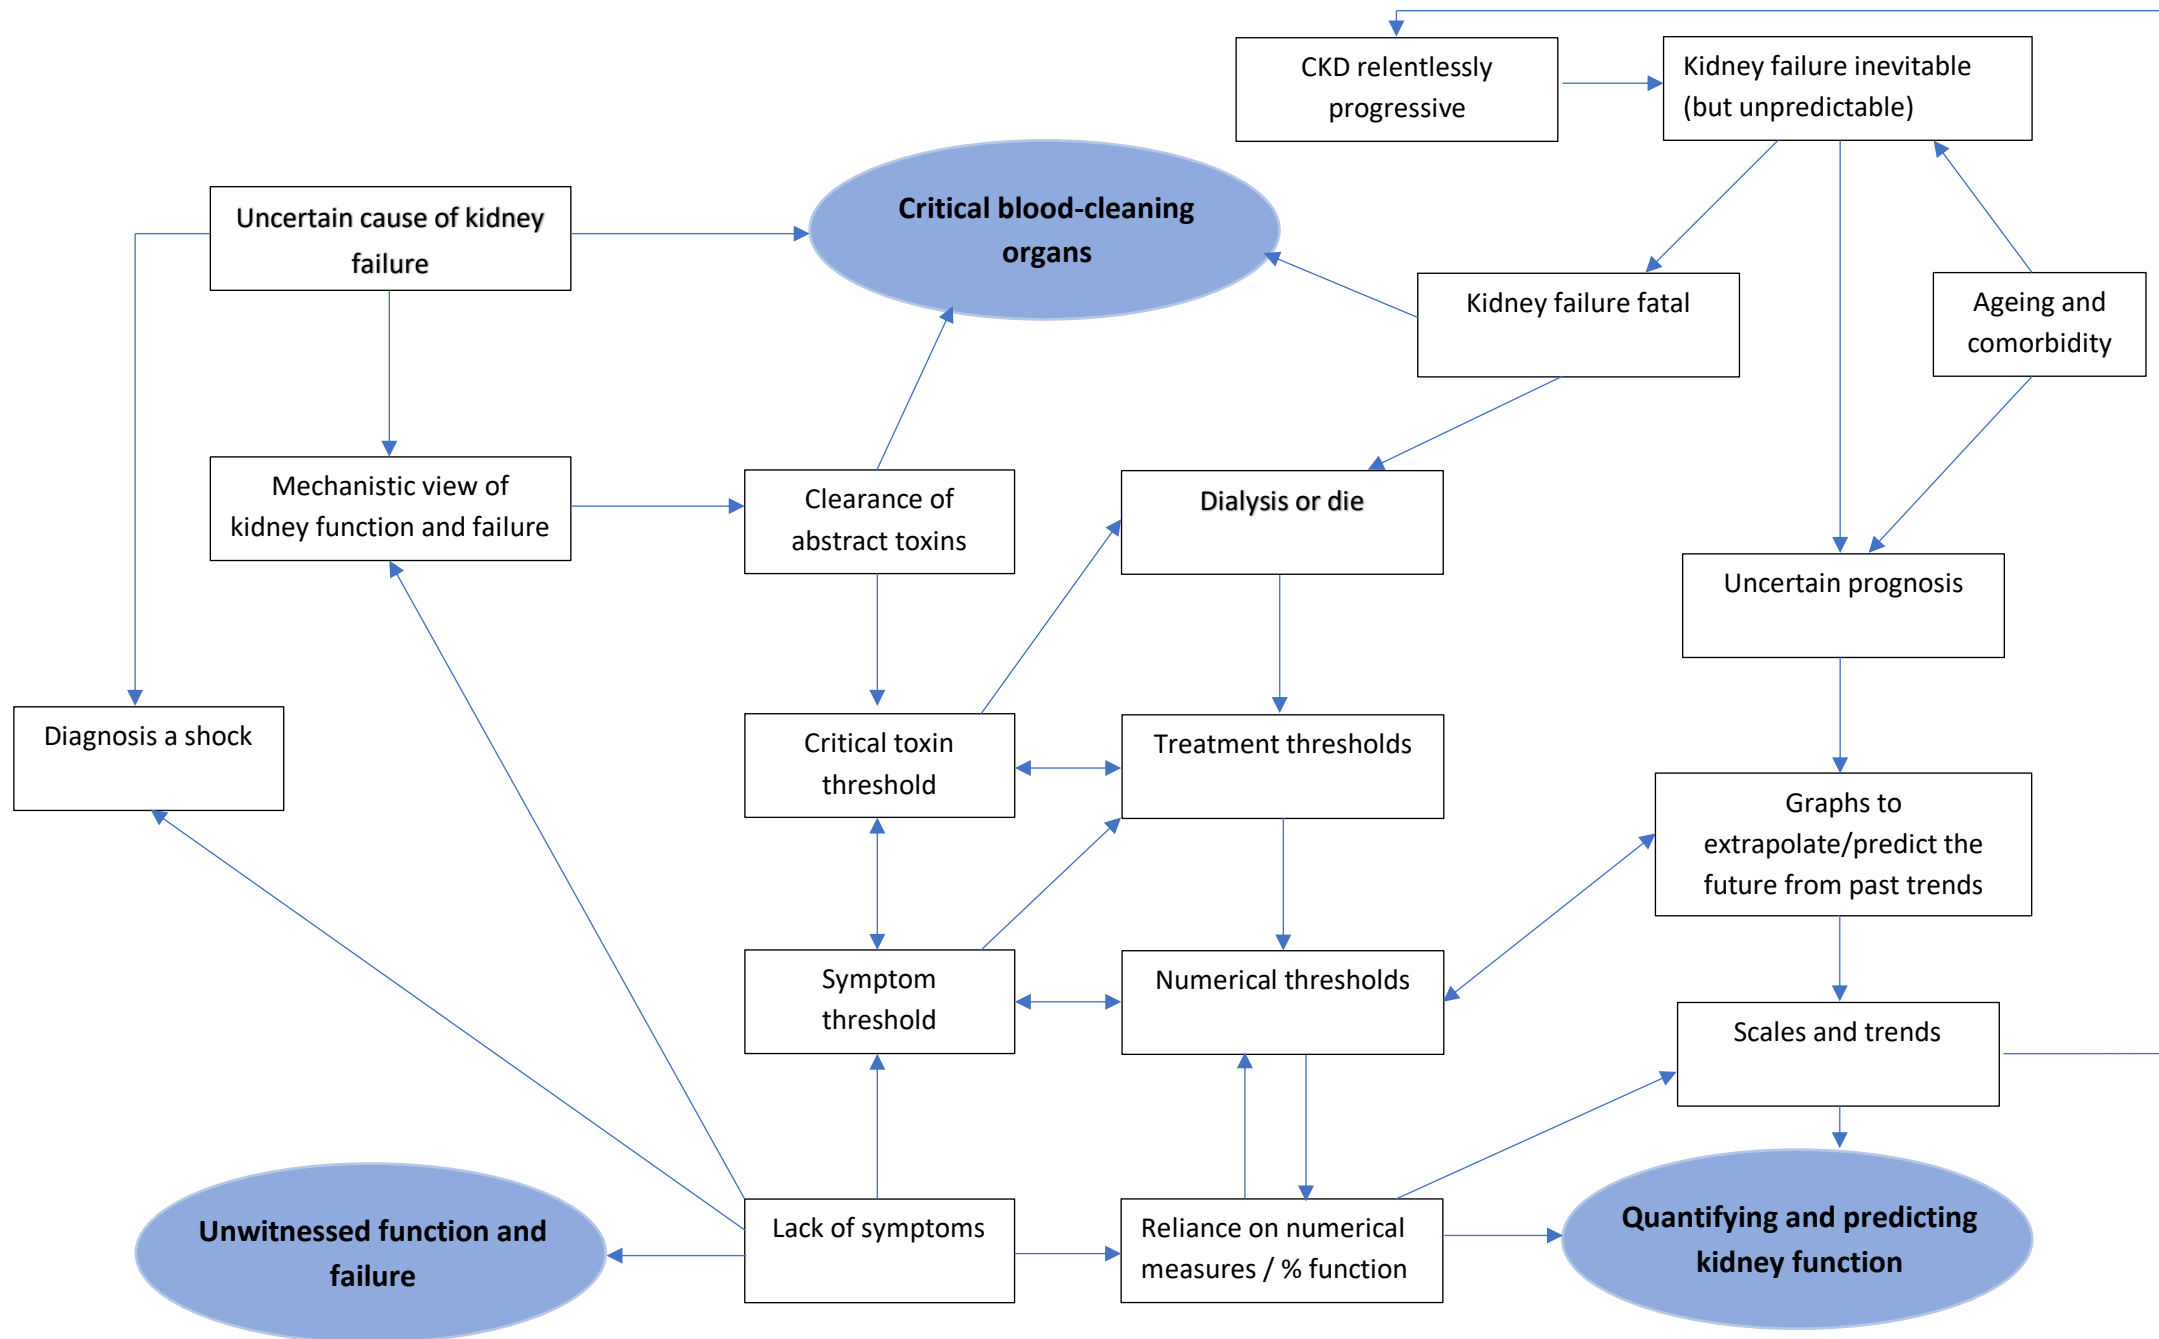

**Supplementary File S3.** Thematic map linking sub-themes into broader overarching parent themes
